# Supplementary material for: Identification of the feline foamy virus Bet domain essential for APOBEC3 counteraction
Source: PubMed Central journal article supplement (PMC3751544; doi:10.1186/1742-4690-10-76), 2013-07-24

A

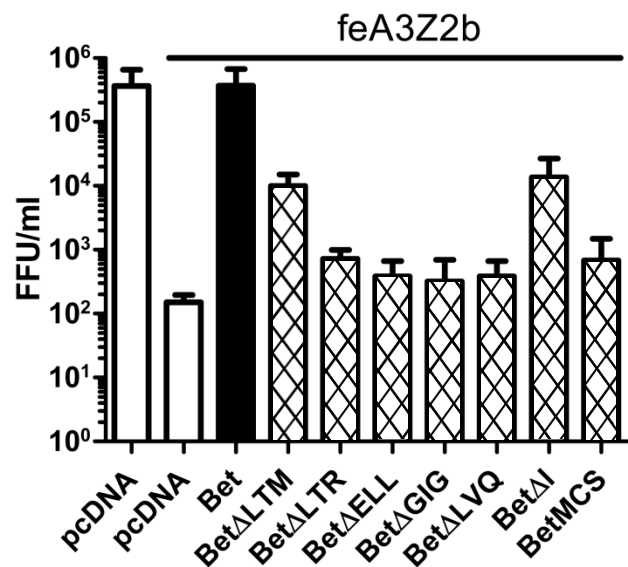

B

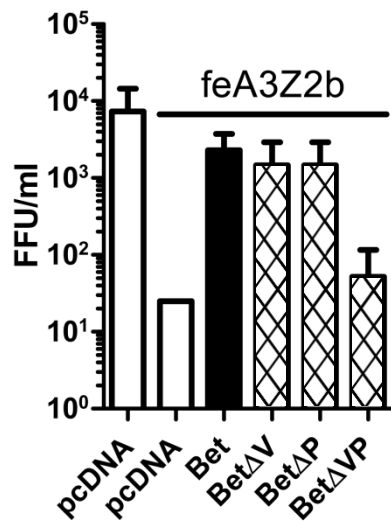

C

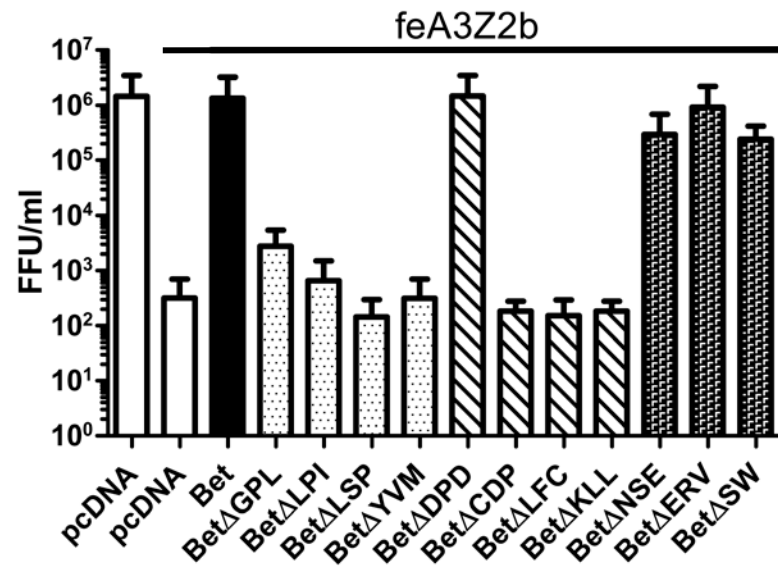

D

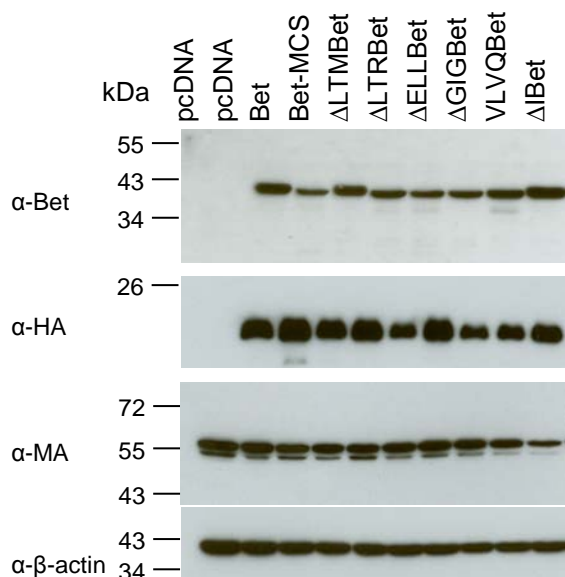

E

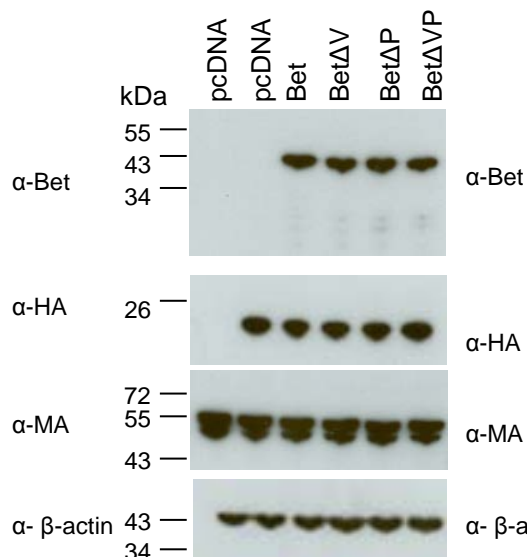

F

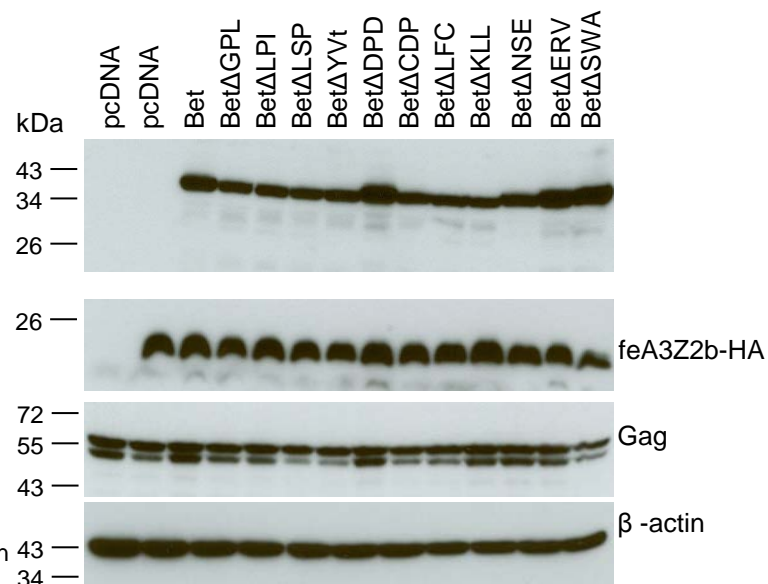

Supplement: 1742-4690-10-76-S3.pdf [file 1742-4690-10-76-S3.pdf]
